# Supplementary material for: Have cementless and resurfacing components improved the medium-term results of hip replacement for patients under 60 years of age? Patient-reported outcome measures, implant survival, and costs in 24,709 patients
Source: PubMed Central journal article supplement — Acta Orthop. 2015 Jan 22;86(1):7–17. doi: 10.3109/17453674.2014.972256 (PMC4366667; doi:10.3109/17453674.2014.972256), 2015-01-22
Supplement: ORT-86-007-s6590.pdf [file ORT-86-007-s6590.pdf]

## Supplementary article data

# Have cementless and resurfacing components improved the medium-term results of hip replacement for patients under 60 years of age?

## Patient-reported outcome measures, implant survival, and costs in 24,709 patients

Simon S JAMESON<sup>1,2</sup>, James MASON<sup>2</sup>, Paul BAKER<sup>1</sup>, Paul J GREGG<sup>1</sup>, Martyn PORTER<sup>1,3</sup>, David J DEEHAN<sup>4</sup>, and Mike R REED<sup>5</sup>

---

School of Medicine, Pharmacy and Health, Durham University, Queen's Campus, University Boulevard, Stockton-on-Tees, UK. <sup>1</sup>The National Joint Registry for England and Wales; <sup>2</sup>School of Medicine, Pharmacy and Health, Durham University; <sup>3</sup>Wrightington, Wigan and Leigh NHS Foundation Trust; <sup>4</sup>Newcastle Hospitals NHS Foundation Trust; <sup>5</sup>Northumbria Healthcare NHS Foundation Trust.

Correspondence: [simonjameson@doctors.org.uk](mailto:simonjameson@doctors.org.uk)

Submitted 2013-07-06. Accepted 2014-04-05

Table 1. Summary of the demographic and surgical variables available for analysis

|                                                                                                               | Source    | Description                                                                                                                                                                                                                                                                   |
|---------------------------------------------------------------------------------------------------------------|-----------|-------------------------------------------------------------------------------------------------------------------------------------------------------------------------------------------------------------------------------------------------------------------------------|
| <b>Patient factors</b>                                                                                        |           |                                                                                                                                                                                                                                                                               |
| Age (years)                                                                                                   | NJR/PROMs |                                                                                                                                                                                                                                                                               |
| Sex                                                                                                           | NJR/PROMs |                                                                                                                                                                                                                                                                               |
| American Society of Anaesthesiology (ASA) grade                                                               | NJR       | Grades 1 to 4                                                                                                                                                                                                                                                                 |
| Body mass index (BMI) (kg/m <sup>2</sup> )                                                                    | NJR       | Only BMI within 15 kg/m <sup>2</sup> to 60 kg/m <sup>2</sup> included                                                                                                                                                                                                         |
| Comorbidities                                                                                                 | PROMs     | Recorded by patients as part of the preoperative PROMs questionnaire. Nine comorbidities: i) ischaemic heart disease, ii) respiratory disease, iii) diabetes, iv) hypertension, v) kidney disease, vi) liver disease, vii) circulatory problems, viii) cancer, ix) depression |
| Preoperative general health                                                                                   | PROMs     | Indicates the patient's perception of their own general health with 5 options: i) excellent, ii) very good, iii) good, iv) fair, v) poor                                                                                                                                      |
| Preoperative disability                                                                                       | PROMs     | Indicates whether the patient considers themselves to have a disability                                                                                                                                                                                                       |
| Preoperative Oxford hip score (OHS)                                                                           | PROMs     | Derived from adding the points (0 to 4) together from the response to hip symptom-specific questions on a scale of 0 to 48 (0 worst, 48 best)                                                                                                                                 |
| Preoperative EQ5D Visual Analogue Score                                                                       | PROMs     | Indicates how well the patient feels on the day of completing the questionnaire on a scale of 0–100 (0 worst, 100 best)                                                                                                                                                       |
| Preoperative EQ5D index                                                                                       | PROMs     | Single summary score derived from EQ5D profile (based on response to 5 questions) by applying a formula with appropriate operation specific weightings                                                                                                                        |
| <b>Surgical factors</b>                                                                                       |           |                                                                                                                                                                                                                                                                               |
| Lead surgeon grade                                                                                            | NJR       | Consultant or other                                                                                                                                                                                                                                                           |
| Surgeon volume                                                                                                | NJR       | i) Low, ii) medium, iii) high                                                                                                                                                                                                                                                 |
| Approach                                                                                                      | NJR       | i) Posterior, ii) direct lateral, iii) other                                                                                                                                                                                                                                  |
| Patient position                                                                                              | NJR       | i) Lateral, ii) supine, iii) not recorded                                                                                                                                                                                                                                     |
| Type of replacement                                                                                           | NJR       | i) Best cemented, ii) Other cemented, iii) Best hybrid, iv) Other hybrid, v) Best cementless, vi) Other cementless, vii) Best resurfacing, viii) Other resurfacing                                                                                                            |
| Anaesthesia                                                                                                   | NJR       | i) Regional only, ii) general only, iii) general and regional                                                                                                                                                                                                                 |
| Chemical venous thromboembolism prophylaxis                                                                   | NJR       | Intended prophylaxis as recorded at time of operation: i) aspirin only, ii) LMWH only, iii) other, iv) none, v) not recorded                                                                                                                                                  |
| Mechanical venous thromboembolism prophylaxis                                                                 | NJR       | Intended prophylaxis as recorded at time of operation: i) Compression stockings (CS) only, ii) combination CS/mechanical pump, iii) foot pump only, iv) intermittent calf pump only, v) other, vi) none, vii) not recorded                                                    |
| Time from operation to postoperative PROMs completion                                                         | PROMs     | Calculated from the date of operation as recorded on the NJR database to the date of postoperative PROMs as recorded on the questionnaire                                                                                                                                     |
| NJR – National Joint Registry, PROMs – patient-reported outcome measures, LMWH – low molecular weight heparin |           |                                                                                                                                                                                                                                                                               |

Table 8. Competing-risks survival modeling of hip type using different variable sets

| Males             | Simple |             |         | BMI included <sup>a</sup> |             |         | BMI excluded,<br>ASA group and age included |             |         |
|-------------------|--------|-------------|---------|---------------------------|-------------|---------|---------------------------------------------|-------------|---------|
|                   | HR     | (95% CI)    | p-value | HR                        | (95% CI)    | p-value | HR                                          | (95% CI)    | p-value |
| Best cemented     | 1      |             |         | 1                         |             |         | 1                                           |             |         |
| Other cemented    | 0.78   | (0.17–3.46) | 0.7     | –                         |             |         | 0.77                                        | (0.17–3.45) | 0.7     |
| Best hybrid       | 0.48   | (0.11–2.16) | 0.3     | –                         |             |         | 0.48                                        | (0.11–2.16) | 0.3     |
| Other hybrid      | 1.40   | (0.45–4.35) | 0.6     | 1.16                      | (0.23–5.74) | 0.9     | 1.34                                        | (0.43–4.17) | 0.6     |
| Best cementless   | 0.62   | (0.14–2.79) | 0.5     | 0.31                      | (0.03–3.45) | 0.3     | 0.62                                        | (0.14–2.78) | 0.5     |
| Other cementless  | 1.51   | (0.55–4.18) | 0.4     | 1.00                      | (0.23–4.25) | 1.0     | 1.46                                        | (0.53–4.05) | 0.5     |
| Best resurfacing  | 1.01   | (0.37–2.76) | 1.0     | 0.67                      | (0.16–2.77) | 0.6     | 1.02                                        | (0.37–2.78) | 1.0     |
| Other resurfacing | 2.08   | (0.72–6.00) | 0.2     | 1.91                      | (0.41–8.86) | 0.4     | 2.06                                        | (0.71–5.97) | 0.3     |

HR – hazard ratio, CI – confidence interval.  
<sup>a</sup> BMI (body mass index) data available for 4,781 implants (37%)

Table 9. Variables included in the competing-risks survival model

|                            | Females |                | Males  |                     |
|----------------------------|---------|----------------|--------|---------------------|
|                            | Simple  | Multi-variable | Simple | Multi-variable      |
| Age                        | < 0.001 | 0.07           | 0.25   | 0.24                |
| ASA grade                  | 0.92    | 0.08           | 0.11   | 0.04                |
| Body mass index (BMI)      | 0.45    | -              | 0.02   | (0.08) <sup>a</sup> |
| Hip type                   | < 0.001 | <0.001         | 0.12   | 0.17                |
| Approach                   | 0.18    | -              | 0.05   | -                   |
| Surgeon grade              | 0.59    | -              | 0.93   | -                   |
| Surgeon volume             | 0.65    | -              | 0.45   | -                   |
| Anaesthesia type           | 0.31    | -              | 0.28   | -                   |
| Mechanical VTE prophylaxis | 0.72    | -              | 0.02   | -                   |
| Chemical VTE prophylaxis   | 0.65    | -              | 0.75   | -                   |

<sup>a</sup> BMI data available for only 4,781 procedures (37%) therefore excluded from the model. Results in appendix Table 3 show similar results for models with and without BMI.

Table 10. Variables included in the change score analysis of covariance models

|                                        | Oxford hip score change |         | EQ5D index change |         |
|----------------------------------------|-------------------------|---------|-------------------|---------|
|                                        | Females                 | Males   | Females           | Males   |
| Hip type                               | 0.005                   | 0.8     | 0.7               | 0.3     |
| Age                                    | –                       | –       | –                 | –       |
| Approach                               | 0.02                    | –       | –                 | –       |
| Preoperative Oxford hip score          | < 0.001                 | < 0.001 | –                 | 0.001   |
| ASA group                              | –                       | 0.002   | –                 | 0.005   |
| Preoperative EQ5D index                | –                       | –       | < 0.001           | < 0.001 |
| Preoperative general health            | < 0.001                 | < 0.001 | < 0.001           | < 0.001 |
| Preoperative disability                | 0.001                   | 0.001   | 0.001             | 0.001   |
| Circulatory problems                   | –                       | 0.001   | –                 | < 0.001 |
| History of depression                  | < 0.001                 | –       | < 0.001           | 0.02    |
| Body mass index                        | –                       | –       | –                 | –       |
| History of heart disease               | < 0.001                 | 0.01    | 0.005             | –       |
| Time from op to PROMs completion       | –                       | –       | –                 | –       |
| Goodness of fit of model (adjusted R2) | 33%                     | 32%     | 60%               | 52%     |
